# Supplementary material
Source: ML conference proceedings conference paper supplement (https://openaccess.thecvf.com/content/CVPR2022/html/Zhang_Critical_Regularizations_for_CVPR_2022_paper.html)
Supplement: Supplementary file 1 [file Zhang_Critical_Regularizations_for_CVPR_2022_supplemental.zip]

Archive with 4 entries (4 files):
- 05644_supp.mp4
- __MACOSX/._05644_supp.mp4
- 05644-supp.pdf
- __MACOSX/._05644-supp.pdf
